# Supplementary material for: Indirect reciprocity is sensitive to costs of information transfer
Source: PubMed Central journal article supplement — Sci Rep. 2013 Mar 13;3:1435. doi: 10.1038/srep01435 (PMC3595703; doi:10.1038/srep01435), 2013-03-13
Supplement: srep01435-s1.pdf [file srep01435-s1.pdf]

**Supplementary Information**

**Title: Indirect reciprocity is sensitive to costs of information transfer**

**Shinsuke Suzuki<sup>a,b,\*</sup> and Hiromichi Kimura<sup>c</sup>**

**<sup>a</sup>Division of the Humanities and Social Sciences, California Institute of Technology,  
1200 E. California Blvd., Pasadena, CA 91125, USA.**

**<sup>b</sup>JSPS fellow, Graduate School of Letters, Hokkaido University, Kita 10, Nishi 7,  
Kita-ku, Sapporo, Hokkaido 060-0810, Japan.**

**<sup>c</sup>Mizonokuchi Institute of Technology, Futako 6-11-14, Takatsu-ku, Kawasaki,  
Kanagawa 213-0002, Japan.**

**\*Correspondence and requests for materials:**

**Shinsuke Suzuki, Ph.D.**

**Division of the Humanities and Social Sciences, California Institute of Technology,  
1200 E. California Blvd., Pasadena, CA 91125, USA**

**Tel.: +1-626-395-8457. Fax: +1-626-405-9841.**

**E-mail address: [shinsuke.szk@gmail.com](mailto:shinsuke.szk@gmail.com)**

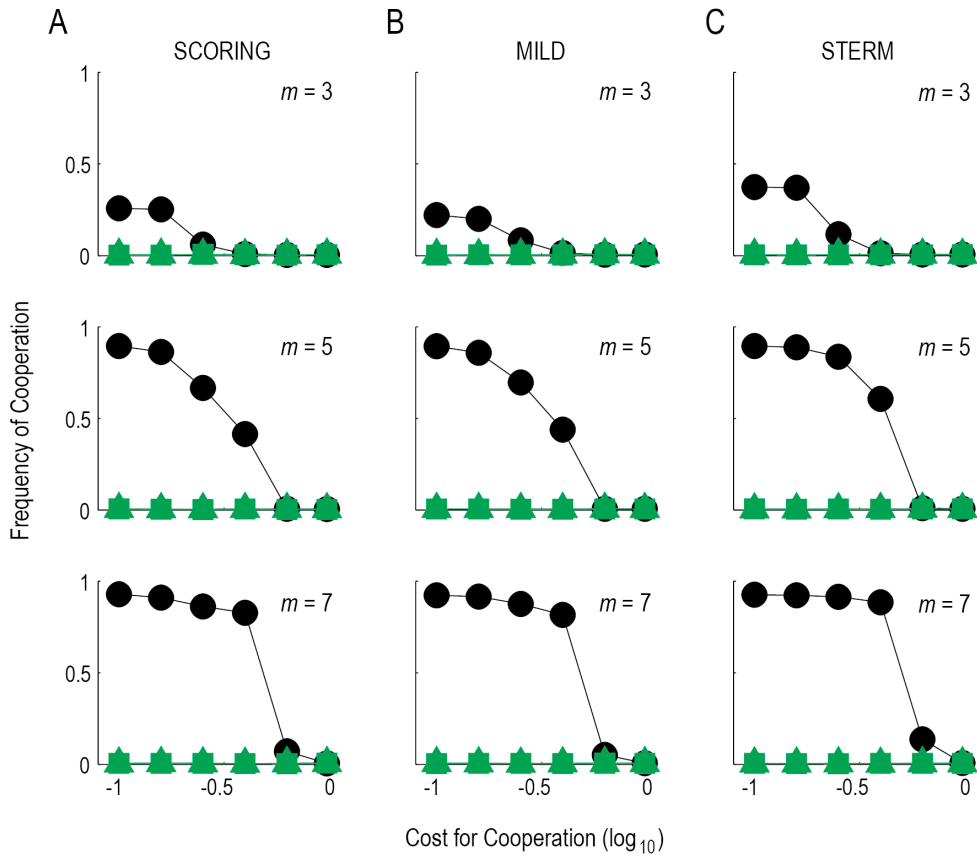

**Fig. S1.** Effect of the cost of reputation building,  $c_R$ , on the evolution of cooperation in a situation where the reputation of a donor is built by the recipient instead of a third person/observer. The figure format and simulation parameters are the same as those used for Fig. 1. *Black* points indicate a case without the cost of reputation building, and *green* points represent a case with the cost,  $c_R$  (*triangles*:  $c_R = 0.1$ ; *squares*:  $c_R = 0.01$ ; these symbols overlap). (A) Individuals use the moral assessment rule, *SCORING*. Top row: the average number of rounds for each individual in a generation,  $m$ , is 3; Middle row:  $m = 5$ ; Bottom row:  $m = 7$ . (B) *MILD*. (C) *STERM*.

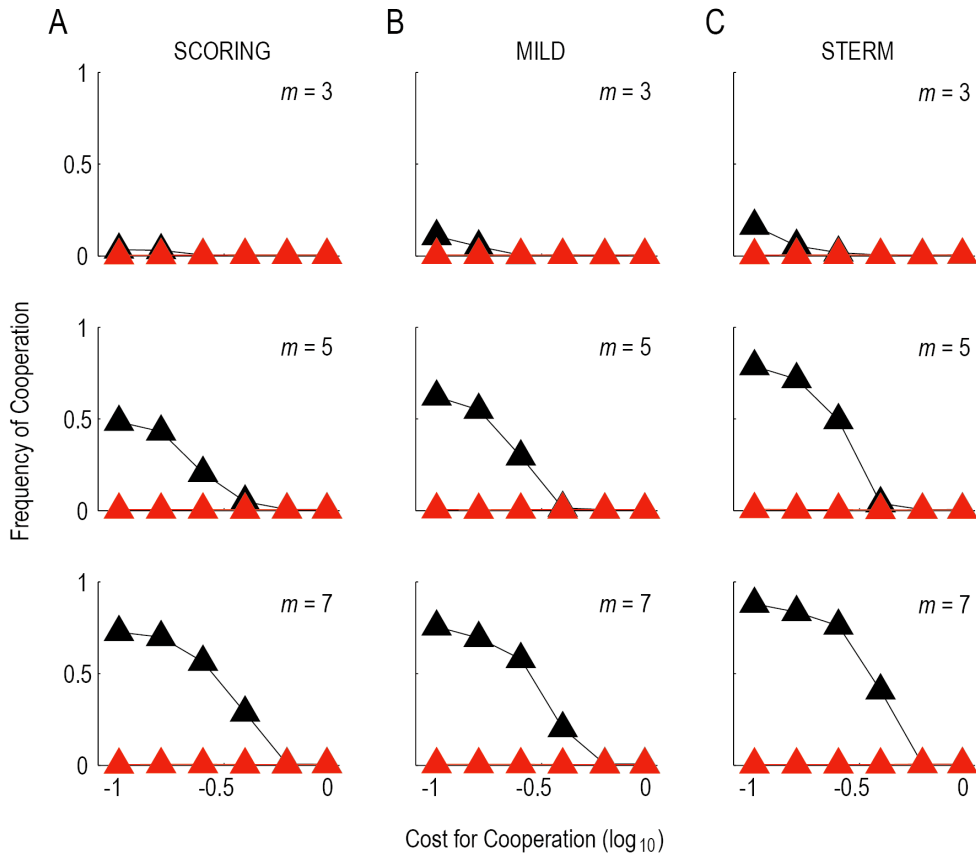

**Fig. S2.** Effect of the cost of reputation building for second-order observers,  $c_{R'}$ , on the evolution of cooperation. The figure format and simulation parameters are the same as those used for Fig. 1, but the cost for (first-order) observers,  $c_R$ , is fixed at 0.1. *Black* points indicate a case without the cost for second-order observers (i.e.,  $c_{R'} = 0$ ), and *red* points represent a case with the cost,  $c_{R'} = 0.1$ . (A) Individuals use the moral assessment rule, *SCORING*. Top row: the average number of rounds for each individual in a generation,  $m$ , is 3; Middle row:  $m = 5$ ; Bottom row:  $m = 7$ . (B) *MILD*. (C) *STERM*.

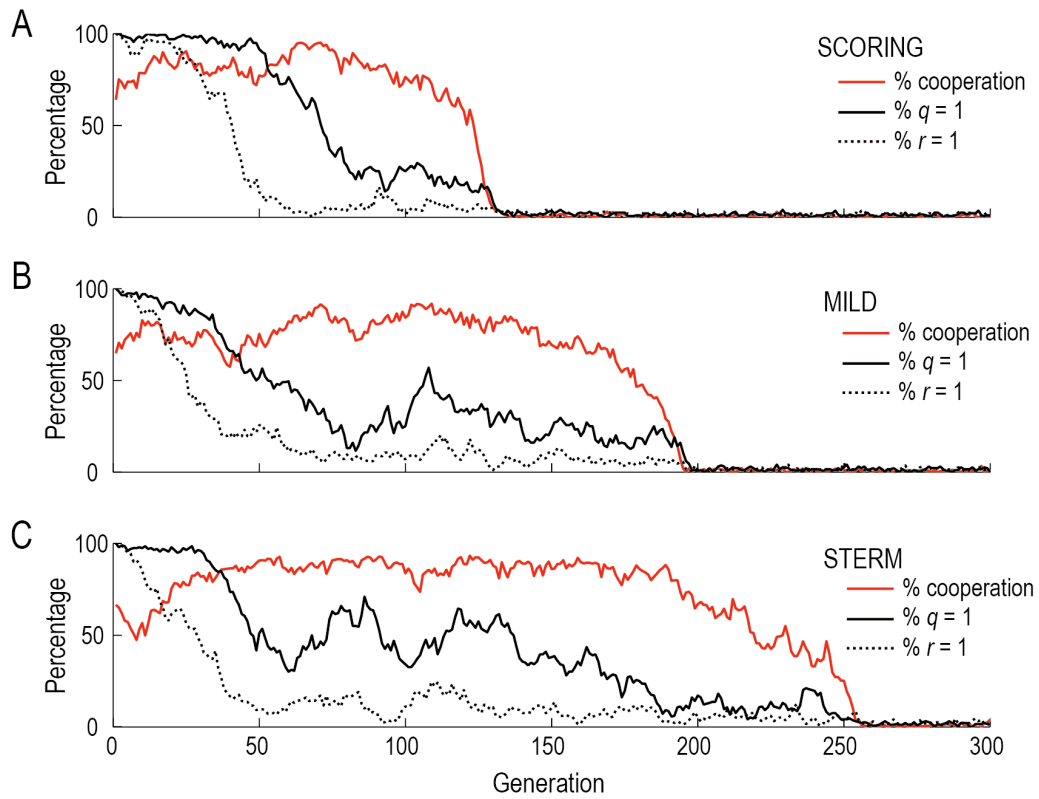

**Fig. S3.** Evolutionary dynamics in a situation where an observer who does not build the donor's reputation can lose his/her own good reputation. The percentages of cooperation (*red solid lines*), the individuals who build the donor's reputation when in the role of an observer (i.e.,  $q = 1$ ; *black solid lines*) and the individuals who build the observer's reputation in the role of a second-order observer (i.e.,  $r = 1$ ; *black dotted lines*) in a typical simulation run are plotted as a function of generation (benefit of cooperation  $b = 1$ ; cost of cooperation  $c = 0.25$ ; population size  $n = 200$ ; the average number of rounds for each individual in a generation  $m = 5$ ; probability of implementation error  $\varepsilon = 0.05$ ; mutation rate  $\mu = 0.01$ ; cost of reputation building,  $c_R = c_{R'} = 0.1$ ; at the first generation an individual's strategy  $k$  is determined randomly and  $q = r = 1$ ). Regardless of the moral assessment rules, an individual building reputation in the role of a

second-order observer ( $r = 1$ ) is exploited by individuals with  $r = 0$  because of the cost  $c_R$ ; then, no individual builds the donor's reputation in the role of a (first-order) observer since the reputation-building no longer results in the observer's good reputation; thus, indirect reciprocity never works. (A) Individuals use the moral assessment rule, *SCORING*. (B) *MILD*. (C) *STERM*.
